# Supplementary material
Source: PubMed Central journal article supplement (PMC4525878)
Supplement: ijcep0008-6627-f3.pdf [file ijcep0008-6627-f3.pdf]

## PRX4 as a lung cancer prognostic marker

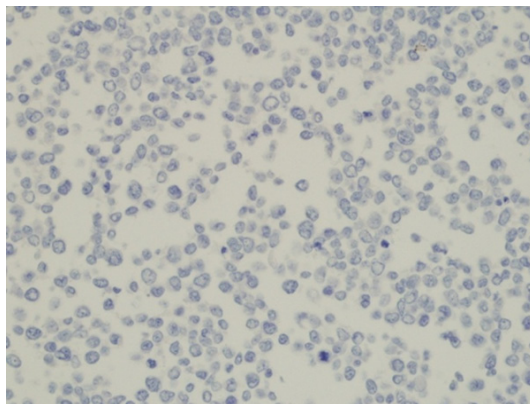

**Figure S1.** Photomicrograph of normal human bronchial epithelial cells (BEAS-2B).

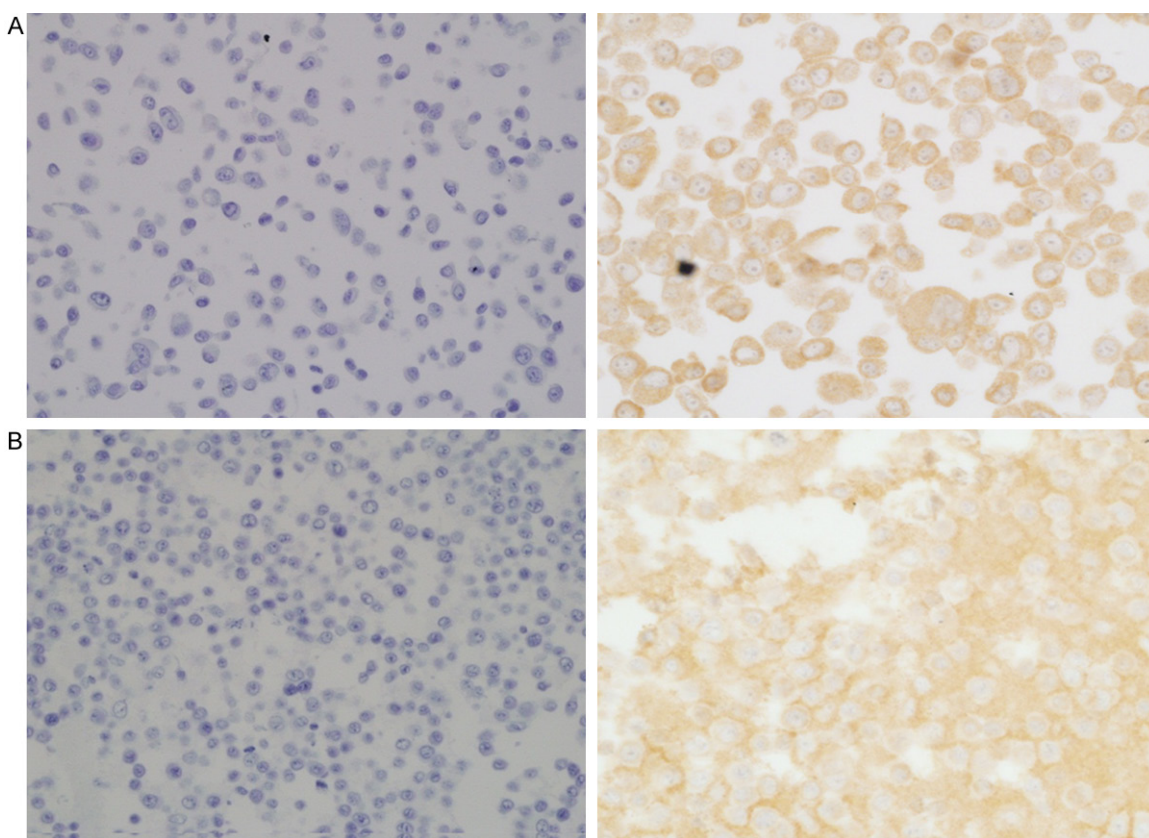

**Figure S2.** Photomicrographs of negative and positive controls (left column: negative control, right column: positive control), representing (A) H1793 cells and (B) A549 cells, respectively. (Original magnification-left column:  $\times 200$ , right column:  $\times 400$ ).
